# Supplementary material
Source: ML conference proceedings conference paper supplement (https://aclanthology.org/D19-1433)
Supplement: Attachment [file acl2019-supp.pdf › acl2019-supp.pdf]

# Unsupervised Domain Adaptation of Contextualized Embeddings for Sequence Labeling: Supplement

**Xiaochuang Han** and **Jacob Eisenstein**

Georgia Institute of Technology

`hxc@cmu.edu`, `me@jacob-eisenstein.com`

## 1 Training/test split

No canonical training/test split exists for the PPCEME. We randomly select 25% of the documents for the test set, shown in [Table 1](#) and [Table 2](#). The remaining 75% of documents are used for domain-adaptive fine-tuning in the AdaptaBERT results, and for training in the supervised fine-tuning results. For the PTB, we use sections 0-18 for task-specific fine-tuning in the AdaptaBERT results and report secondary performance on sections 19-21.

|        | # documents | # tokens |
|--------|-------------|----------|
| Train: | 333         | 1473103  |
| Test:  | 115         | 488054   |

Table 1: Statistics of the training and test set from PPCEME used in our experiments.

|                         |                          |                         |
|-------------------------|--------------------------|-------------------------|
| alhatton-e3-h.pos       | armin-e2-p1.pos          | aungier-e3-h.pos        |
| aungier-e3-p2.pos       | authold-e2-h.pos         | bacon-e2-h.pos          |
| bacon-e2-p1.pos         | blundev-e2-h.pos         | boethco-e1-p1.pos       |
| boethco-e1-p2.pos       | boethpr-e3-p2.pos        | burnetcha-e3-p1.pos     |
| burnetroc-e3-h.pos      | burnetroc-e3-p1.pos      | chaplain-e1-p2.pos      |
| clowesobs-e2-p2.pos     | cromwell-e1-p1.pos       | cromwell-e1-p2.pos      |
| delapole-e1-p1.pos      | deloney-e2-p1.pos        | drummond-e3-p1.pos      |
| edmondes-e2-h.pos       | edmondes-e2-p1.pos       | edward-e1-h.pos         |
| edward-e1-p1.pos        | eliz-1590-e2-p2.pos      | elyot-e1-p1.pos         |
| eoxinden-1650-e3-p1.pos | fabyan-e1-p1.pos         | fabyan-e1-p2.pos        |
| farquhar-e3-h.pos       | farquhar-e3-p1.pos       | fhatton-e3-h.pos        |
| fiennes-e3-p2.pos       | fisher-e1-h.pos          | forman-diary-e2-p2.pos  |
| fryer-e3-p1.pos         | gascoigne-1510-e1-p1.pos | gawdy-e2-h.pos          |
| gawdy-e2-p1.pos         | gawdy-e2-p2.pos          | gifford-e2-p1.pos       |
| grey-e1-p1.pos          | harley-e2-h.pos          | harley-e2-p1.pos        |
| harleyedw-e2-p2.pos     | harman-e1-h.pos          | henry-1520-e1-h.pos     |
| hooker-b-e2-h.pos       | hoole-e3-p2.pos          | hoxinden-1640-e3-p1.pos |
| interview-e1-p2.pos     | jetaylor-e3-h.pos        | jetaylor-e3-p1.pos      |
| jopinney-e3-p1.pos      | jotaylor-e2-p1.pos       | joxinden-e2-p2.pos      |
| jubarring-e2-p1.pos     | knyvett-1630-e2-p2.pos   | koxinden-e2-p1.pos      |
| kpaston-e2-h.pos        | kpaston-e2-p1.pos        | kscrope-1530-e1-h.pos   |
| leland-e1-h.pos         | leland-e1-p2.pos         | lisle-e3-p1.pos         |
| madox-e2-h.pos          | marches-e1-p1.pos        | markham-e2-p2.pos       |
| masham-e2-p1.pos        | masham-e2-p2.pos         | memo-e3-p2.pos          |
| milton-e3-h.pos         | mroper-e1-p1.pos         | mroper-e1-p2.pos        |
| nhadd-1700-e3-h.pos     | nhadd-1700-e3-p1.pos     | penny-e3-p2.pos         |
| pepys-e3-p1.pos         | perrott-e2-p1.pos        | pettit-e2-h.pos         |
| pettit-e2-p1.pos        | proposals-e3-p2.pos      | rcecil-e2-p1.pos        |
| record-e1-h.pos         | record-e1-p1.pos         | record-e1-p2.pos        |
| rhaddjr-e3-h.pos        | rhaddsr-1670-e3-p2.pos   | rhaddsr-1700-e3-h.pos   |
| rhaddsr-1710-e3-p2.pos  | roper-e1-h.pos           | roxinden-1620-e2-h.pos  |
| rplumpt-e1-p1.pos       | rplumpt2-e1-p2.pos       | shakesp-e2-h.pos        |
| shakesp-e2-p1.pos       | somers-e3-h.pos          | stat-1540-e1-p1.pos     |
| stat-1570-e2-p1.pos     | stat-1580-e2-p2.pos      | stat-1600-e2-h.pos      |
| stat-1620-e2-p2.pos     | stat-1670-e3-p2.pos      | stenenso-e1-h.pos       |
| tillots-a-e3-h.pos      | tillots-b-e3-p1.pos      | turner-e1-h.pos         |
| tyndold-e1-p1.pos       | udall-e1-p2.pos          | underhill-e1-p2.pos     |
| vicary-e1-h.pos         | walton-e3-p1.pos         | wplumpt-1500-e1-h.pos   |
| zouch-e3-p2.pos         |                          |                         |

Table 2: Test set documents from the PPCEME used in our experiments.
